# Supplementary material for: C-reactive protein and hypertension among Ghanaian migrants and their homeland counterparts: the Research on Obesity and Diabetes among African Migrants study
Source: PubMed Central journal article supplement (PMC8728758; doi:10.1097/hjh.0000000000003006), 2021-09-02
Supplement: jhype-40-283-s001.pdf [file jhype-40-283-s001.pdf]

**Supplementary table 1** Odds ratios (95% confidence intervals) for hypertension in participants with high versus low C-reactive protein levels, stratified by site and sex, after exclusion of participants with CRP levels >10 mg/L

|              | N    | Model 1<br>OR (95% CI) | Model 2<br>OR (95% CI) | Model 3<br>OR (95% CI) |
|--------------|------|------------------------|------------------------|------------------------|
| <b>Men</b>   |      |                        |                        |                        |
| Europe       | 1284 | 1.78 (1.18-2.67)**     | 1.74 (1.13-2.67)*      | 1.45 (0.92-2.27)       |
| Urban Ghana  | 389  | 1.15 (0.55-2.39)       | 1.11 (0.52-2.36)       | 0.83 (0.37-1.89)       |
| Rural Ghana  | 399  | 0.84 (0.41-1.71)       | 0.84 (0.40-1.76)       | 0.72 (0.30-1.68)       |
| <b>Women</b> |      |                        |                        |                        |
| Europe       | 1732 | 1.58 (1.21-2.05)**     | 1.55 (1.18-2.05)**     | 1.31 (0.97-1.76)       |
| Urban Ghana  | 946  | 1.24 (0.88-1.76)       | 1.22 (0.86-1.74)       | 0.87 (0.59-1.28)       |
| Rural Ghana  | 607  | 0.79 (0.49-1.26)       | 0.81 (0.50-1.32)       | 0.59 (0.34-1.02)       |

N = participants per site included in model 1, OR, Odds ratio, CI, confidence interval

\*p<0.05, \*\*p<0.01, \*\*\*p<0.001

Reference category: CRP level <3 mg/L

Model 1: adjusted for age

Model 2: adjusted for age and educational attainment

Model 3: adjusted for age, educational attainment, body mass index, smoking, alcohol intake, diabetes, high density lipoprotein and triglycerides
