# Supplementary material for: C-reactive protein and hypertension among Ghanaian migrants and their homeland counterparts: the Research on Obesity and Diabetes among African Migrants study
Source: PubMed Central journal article supplement (PMC8728758; doi:10.1097/hjh.0000000000003006), 2021-09-02
Supplement: jhype-40-283-s002.pdf [file jhype-40-283-s002.pdf]

**Supplementary table 2** Beta coefficients (95% confidence intervals) for blood pressure levels per 1 unit increase in logarithmically transformed C-reactive protein concentration, stratified by site and sex, after exclusion of participants with CRP levels >10 mg/L

|              |     | N    | Model 1<br>β (95% CI) | Model 2<br>β (95% CI) | Model 3<br>β (95% CI) |
|--------------|-----|------|-----------------------|-----------------------|-----------------------|
| <b>Men</b>   |     |      |                       |                       |                       |
| Europe       | SBP | 1284 | 2.82 (1.29-4.35)***   | 2.69 (1.16-4.21)**    | 1.24 (-0.36-2.84)     |
|              | DBP | 1284 | 1.58 (0.58-2.57)**    | 1.50 (0.51-2.49)**    | 0.59 (-0.46-1.63)     |
| Urban Ghana  | SBP | 389  | -0.82 (-3.52-1.88)    | -0.82 (-3.53-1.89)    | -1.04 (-3.88-1.79)    |
|              | DBP | 389  | 0.19 (-1.54-1.92)     | 0.21 (-1.53-1.95)     | 0.06 (-1.73-1.85)     |
| Rural Ghana  | SBP | 399  | -1.63 (-4.00-0.74)    | -1.71 (-4.11-0.68)    | -2.10 (-4.49-0.29)    |
|              | DBP | 399  | -0.53 (-2.01-0.96)    | -0.60 (-2.10-0.90)    | -0.49 (-1.99-1.02)    |
| <b>Women</b> |     |      |                       |                       |                       |
| Europe       | SBP | 1732 | 2.34 (1.17-3.51)***   | 2.33 (1.16-3.50)***   | 0.51 (-0.81-1.82)     |
|              | DBP | 1732 | 1.06 (0.31-1.81)**    | 1.07 (0.315-1.82)**   | -0.06 (-0.90-0.78)    |
| Urban Ghana  | SBP | 946  | 3.31 (1.78-4.84)***   | 3.32 (1.79-4.85)***   | 1.85 (0.15-3.54)      |
|              | DBP | 946  | 1.71 (0.75-2.67)      | 1.71 (0.75-2.67)      | 0.41 (-0.66-1.47)     |
| Rural Ghana  | SBP | 607  | 0.18 (-1.97-2.34)     | 0.79 (-1.86-2.44)     | -0.34 (-2.61-1.93)    |
|              | DBP | 607  | -0.12 (-1.41-1.17)    | -0.13 (1.42-1.15)     | -0.26 (-1.60-1.09)    |

N = participants per site, SBP, systolic blood pressure, DBP, diastolic blood pressure, CI confidence interval, β, beta score

\*p<0.05, \*\*p<0.01, \*\*\*p<0.001

Model 1: adjusted for age

Model 2: adjusted for age and educational attainment

Model 3: adjusted for age, educational attainment, body mass index, smoking, alcohol intake, diabetes, high density lipoprotein and logarithmically transformed triglycerides
